# Supplementary material for: Self-antigen tetramers discriminate between myelin autoantibodies to native or denatured protein
Source: Springer Nature journal article supplement (doi:10.1038/nm1488), 2007-01-12
Supplement: 41591_2007_BFnm1488_MOESM3_ESM.pdf [file 41591_2007_BFnm1488_MOESM3_ESM.pdf]

**Supplementary table 1.** Diagnoses of “other” CSF samples

| <b>Diagnosis</b>                    | <b>n</b> |
|-------------------------------------|----------|
| Brain metastasis, breast cancer     | 2        |
| Brain metastasis, unknown primary   | 1        |
| Chronic communicating hydrocephalus | 1        |
| Fever of unknown origin             | 3        |
| Head trauma                         | 1        |
| Headache                            | 4        |
| Headache with fever                 | 2        |
| Headache with neurological symptom  | 5        |
| HIV with aseptic meningitis         | 1        |
| HIV with cryptococcal meningitis    | 1        |
| HIV with glioblastoma               | 1        |
| HIV with neurological symptoms      | 2        |
| Meningitis, aseptic                 | 2        |
| Meningitis, erlichia                | 1        |
| Meningitis, fungal                  | 1        |
| Neurocystercercosis                 | 1        |
| Neurosarcoidosis                    | 1        |
| Pituitary Adenoma                   | 1        |
| Pseudotumor cerebri                 | 1        |
| Seizures                            | 2        |
| Tamoxifen neurotoxicity             | 1        |
