# Supplementary material for: Self-antigen tetramers discriminate between myelin autoantibodies to native or denatured protein
Source: Springer Nature journal article supplement (doi:10.1038/nm1488), 2007-01-12
Supplement: 41591_2007_BFnm1488_MOESM4_ESM.pdf [file 41591_2007_BFnm1488_MOESM4_ESM.pdf]

**Supplementary table 2.** Treatment of MS and CIS patients

|                 | <b>RRMS</b> | <b>PPMS</b> | <b>SPMS</b> | <b>CIS</b> | <b>Total</b> |
|-----------------|-------------|-------------|-------------|------------|--------------|
| <b>None</b>     | 48          | 12          | 11          | 32         | 103          |
| <b>Avonex</b>   | 3           | 0           | 0           | 0          | 3            |
| <b>Copaxone</b> | 7           | 1           | 0           | 0          | 8            |
| <b>Cytosan</b>  | 0           | 0           | 1           | 0          | 1            |
| <b>Rebif</b>    | 1           | 0           | 0           | 0          | 1            |
| <b>Unknown</b>  | 17          | 3           | 5           | 0          | 25           |
