# Supplementary material for: Self-antigen tetramers discriminate between myelin autoantibodies to native or denatured protein
Source: Springer Nature journal article supplement (doi:10.1038/nm1488), 2007-01-12
Supplement: 41591_2007_BFnm1488_MOESM5_ESM.pdf [file 41591_2007_BFnm1488_MOESM5_ESM.pdf]

**Supplementary table 3.** Detection of antibodies to MOG by FACS (% of positive cells)

|             | ADEM        | ADEM<br>w/ relapse | Ped MS      | CIS  | MS   | Control |
|-------------|-------------|--------------------|-------------|------|------|---------|
| <b>RIA+</b> | <b>68.3</b> | <b>39</b>          | <b>55.2</b> | 3.08 | 3.93 | 3.61    |
|             | <b>57.2</b> | <b>37.6</b>        | 8.79        | 1.12 | 2.32 | 2.98    |
|             | <b>38.7</b> | 0.42               | 8.29        | 0.88 | 1.8  | 1.85    |
|             | <b>38.3</b> | 0.42               | 4.86        | 0.85 | 1.52 | 0.62    |
|             | 5.03        | 0.05               | 3.18        | 0.56 | 1.42 | 0.46    |
| <b>RIA-</b> | <b>72.9</b> | 0.03               | 0.42        | 0.36 | 0.94 | 0.36    |
|             | 1.65        |                    | 0.02        | 0.31 | 0.93 | 0.35    |
|             | 1.5         |                    |             | 0.3  | 0.6  | 0.29    |
|             | 1.45        |                    |             | 0.22 | 0.57 | 0.2     |
|             | 1.44        |                    |             | 0.16 | 0.54 | 0.13    |
|             | 1.32        |                    |             | 0.10 | 0.39 | 0       |
|             | 1.3         |                    |             |      | 0.28 |         |
|             | 1.17        |                    |             |      |      |         |
|             | 0.8         |                    |             |      |      |         |
|             | 0.4         |                    |             |      |      |         |
| 0.04        |             |                    |             |      |      |         |

Samples with >10% of cells IgG+ were considered positive (**bold**).
