# Supplementary material for: Self-antigen tetramers discriminate between myelin autoantibodies to native or denatured protein
Source: Springer Nature journal article supplement (doi:10.1038/nm1488), 2007-01-12
Supplement: 41591_2007_BFnm1488_MOESM6_ESM.pdf [file 41591_2007_BFnm1488_MOESM6_ESM.pdf]

**Supplementary table 4.** Comparison of RIA and FACS

|             | <b>ADEM</b> | <b>ADEM<br/>w/relapse</b> | <b>Ped MS</b> | <b>CIS</b> | <b>MS</b> | <b>Control</b> |
|-------------|-------------|---------------------------|---------------|------------|-----------|----------------|
| n =         | 16          | 6                         | 7             | 11         | 12        | 11             |
| RIA+, FACS+ | 4           | 2                         | 1             | 0          | 0         | 0              |
| RIA+        | 1           | 1                         | 0             | 0          | 0         | 0              |
| FACS+       | 1           | 0                         | 0             | 0          | 0         | 0              |
