# Supplementary material for: Self-antigen tetramers discriminate between myelin autoantibodies to native or denatured protein
Source: Springer Nature journal article supplement (doi:10.1038/nm1488), 2007-01-12
Supplement: 41591_2007_BFnm1488_MOESM7_ESM.pdf [file 41591_2007_BFnm1488_MOESM7_ESM.pdf]

**Supplementary table 5.** Comparison of RIA and ELISA

|                     | <b>ADEM</b> | <b>Asian MS</b> | <b>Ped MS</b> | <b>Adult-onset MS</b> | <b>CIS</b> | <b>Viral enceph</b> | <b>Control</b> |
|---------------------|-------------|-----------------|---------------|-----------------------|------------|---------------------|----------------|
| <b>n =</b>          | 47          | 12              | 23            | 86                    | 4          | 50                  | 61             |
| <b>RIA+</b>         | 9           | 1               | 1             | 1                     | 0          | 0                   | 0              |
| <b>RIA+, ELISA+</b> | 1           | 0               | 0             | 0                     | 0          | 0                   | 0              |
| <b>ELISA+</b>       | 0           | 0               | 1             | 1                     | 1          | 0                   | 1              |

Only samples analyzed with both methods were included in this analysis.
