# Supplementary material for: Self-antigen tetramers discriminate between myelin autoantibodies to native or denatured protein
Source: Springer Nature journal article supplement (doi:10.1038/nm1488), 2007-01-12
Supplement: 41591_2007_BFnm1488_MOESM8_ESM.pdf [file 41591_2007_BFnm1488_MOESM8_ESM.pdf]

**Supplementary table 6.** Comparison of MOG+ and MOG- ADEM

| Patient data                                  | Anti-MOG positive |      | Anti-MOG negative |      |
|-----------------------------------------------|-------------------|------|-------------------|------|
|                                               | number            | %    | number            | %    |
| n =                                           | 13                |      | 56                |      |
| Median age at first event, years (range)      | 10 (4-41)         |      | 7 (0.8-28)        |      |
| Female                                        | 6/13              | 46.2 | 20/50             | 40.0 |
| Second clinical event                         | 3/11              | 27.3 | 10/39             | 25.6 |
| Oligoclonal bands in CSF                      | 1/4               | 25.0 | 5/14              | 35.7 |
| <b>Sample Source</b>                          |                   |      |                   |      |
| Argentina                                     | 1/13              | 7.7  | 12/56             | 21.4 |
| Germany                                       | 1/13              | 7.7  | 4/56              | 7.1  |
| Japan                                         | 2/13              | 15.4 | 5/56              | 8.9  |
| Canada                                        | 5/13              | 38.5 | 17/56             | 30.4 |
| Russia                                        | 2/13              | 15.4 | 15/56             | 26.8 |
| UK                                            | 2/13              | 15.4 | 2/56              | 3.6  |
| USA                                           | 0/13              | 0    | 1/56              | 1.8  |
| <b>Outcome</b>                                |                   |      |                   |      |
| No residual deficits                          | 4/9               | 44.4 | 24/34             | 70.6 |
| Residual deficits                             | 5/9               | 55.6 | 9/34              | 26.5 |
| <b>Level of consciousness on presentation</b> |                   |      |                   |      |
| Behavioral changes                            | 5/10              | 50.0 | 24/35             | 68.6 |
| Lethargy                                      | 6/10              | 60.0 | 25/35             | 71.4 |
| Coma                                          | 1/10              | 10.0 | 5/33              | 15.2 |
| <b>Seizures</b>                               |                   |      |                   |      |
| Focal seizures                                | 0/10              | 0    | 8/35              | 22.9 |
| Generalized seizures                          | 1/10              | 10.0 | 5/33              | 15.2 |
| <b>Bilateral and unilateral symptoms</b>      |                   |      |                   |      |
| At least one bilateral symptom                | 6/10              | 60.0 | 12/33             | 36.4 |
| Bilateral motor                               | 5/10              | 50.0 | 8/33              | 24.2 |
| Bilateral sensory                             | 3/10              | 30.0 | 3/31              | 9.7  |
| Bilateral optic neuritis                      | 1/10              | 10.0 | 4/33              | 12.1 |
| At least one unilateral symptom               | 1/10              | 10.0 | 24/36             | 66.7 |
| Unilateral motor                              | 1/10              | 10.0 | 17/35             | 48.6 |
| Unilateral sensory                            | 1/10              | 10.0 | 9/33              | 27.3 |
| Unilateral optic neuritis                     | 0/10              | 0    | 6/34              | 17.6 |
| <b>Movement disorders</b>                     |                   |      |                   |      |
| At least one symptom                          | 5/11              | 45.5 | 24/38             | 63.2 |
| Myoclonus                                     | 0/10              | 0    | 1/35              | 2.9  |
| Tremor                                        | 0/10              | 0    | 6/35              | 17.1 |
| Cerebellar ataxia                             | 5/11              | 45.5 | 24/38             | 63.2 |
| <b>Brainstem symptoms</b>                     |                   |      |                   |      |
| At least one brainstem symptom                | 4/10              | 40.0 | 24/38             | 63.2 |
| Facial weakness                               | 0/10              | 0    | 9/35              | 25.7 |
| Dysphagia                                     | 1/10              | 10.0 | 7/35              | 20.0 |
| Dysarthria                                    | 2/10              | 20.0 | 8/34              | 23.5 |
| Ophthalmoplegia                               | 3/10              | 30.0 | 12/35             | 34.3 |
| <b>Location of T2 bright lesions on MRI</b>   |                   |      |                   |      |
| Supratentorial                                | 9/10              | 90.0 | 26/33             | 78.8 |
| Periventricular white matter                  | 6/10              | 60.0 | 26/34             | 76.5 |
| Corpus Callosum, other white matter           | 5/10              | 50.0 | 14/31             | 45.2 |
| Cortical grey matter                          | 3/10              | 30.0 | 9/34              | 26.5 |
| Subcortical grey matter                       | 1/10              | 10.0 | 12/34             | 35.3 |
| Infratentorial                                |                   |      |                   |      |
| Brainstem / cerebellum                        | 5/10              | 50.0 | 21/34             | 61.8 |
| Optic nerve                                   | 1/10              | 10.0 | 5/33              | 15.2 |
| Spine                                         | 3/10              | 30.0 | 12/33             | 36.4 |
| <b>Lesion features on MRI</b>                 |                   |      |                   |      |
| Gadolinium enhancing lesions                  | 4/10              | 40.0 | 11/28             | 39.3 |
| T1 black holes                                | 1/10              | 10.0 | 7/32              | 21.9 |
| Multifocal                                    | 8/10              | 80.0 | 27/33             | 81.8 |
| Focal                                         | 2/10              | 20.0 | 6/32              | 18.8 |
| Single large tumor-like lesion                | 1/10              | 10.0 | 2/32              | 6.3  |
